# Supplementary material
Source: PubMed Central journal article supplement (PMC5101350)
Supplement: halms954487-supplement_1.pdf [file halms954487-supplement_1.pdf]

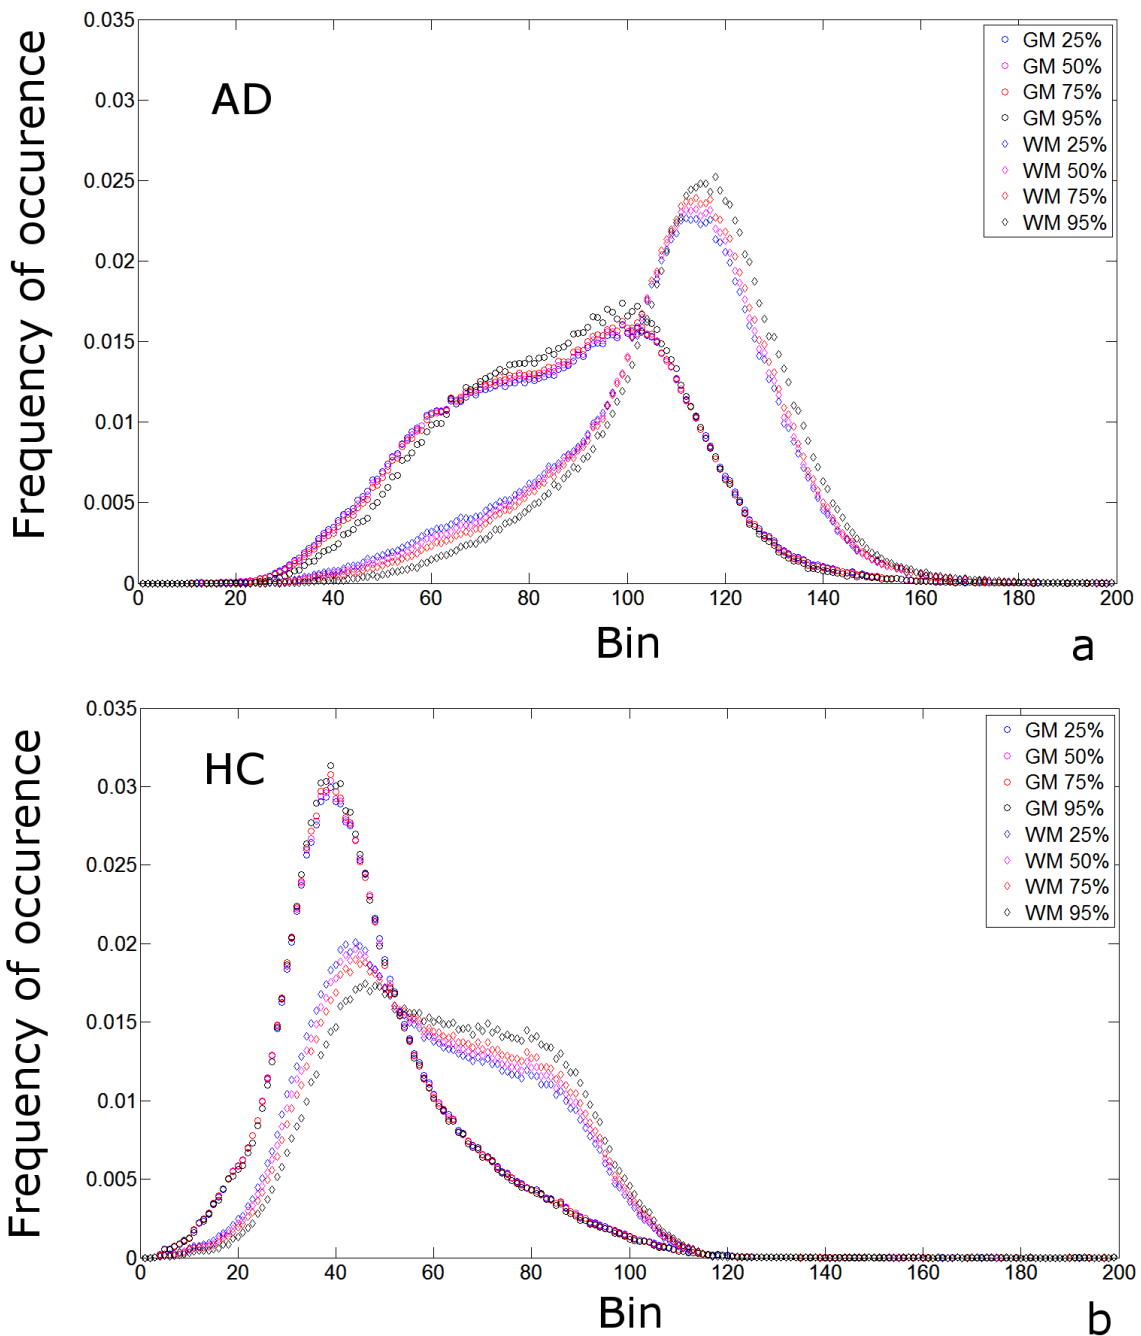

**Supplementary Figure 1.** Intensity histograms of grey and white matter of an AD patients (a) and of a healthy control (b). Histograms were derived from grey and white matter probability images thresholded at 0.25, 0.50, 0.75 and 0.95, corresponding respectively to a probability of the 25%, 50%, 75% and 95% of a voxel of being in grey/white matter. No differences related to the elected threshold are present.

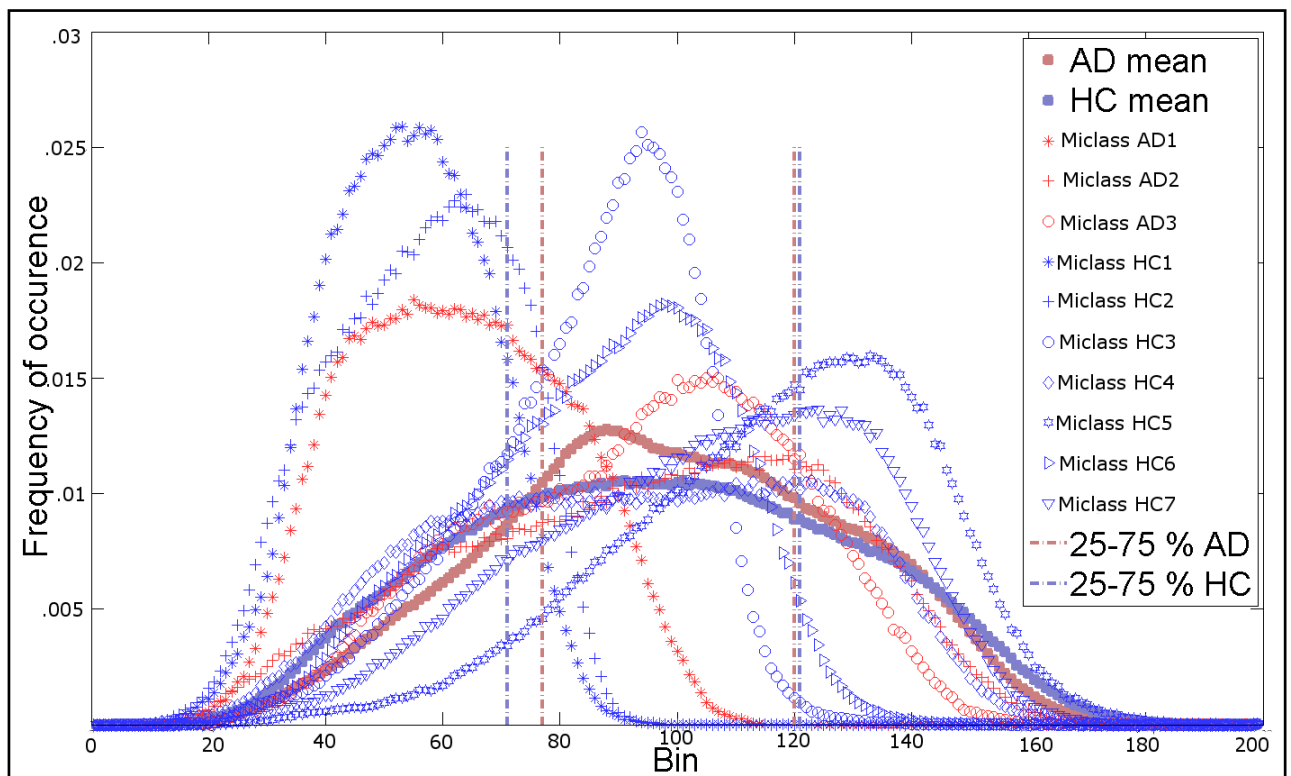

**Supplementary Figure 2.** White matter mean histograms of AD (red filled squares) and HC (blue filled squares) and white matter histograms of the 3 AD patients and of the 7 HC subjects misclassified on the discriminant analysis performed using white matter indexes. The mean histograms were calculated without the misclassified subjects in each group. Vertical pointed-dashed lines in both a and b panels mark 25<sup>th</sup> and 75<sup>th</sup> percentiles of histograms.

**White Matter**

**Eroded**

|                                                              |                 | <i>HC</i>            | <i>AD patients</i>   | <i>F test</i> | <i>p</i> |
|--------------------------------------------------------------|-----------------|----------------------|----------------------|---------------|----------|
| <i>Univariate analysis on white matter histogram indexes</i> | <i>Bin Med</i>  | 18.53 ( $\pm 4.49$ ) | 19.40 ( $\pm 4.66$ ) | .77           | .441     |
|                                                              | <i>Kurtosis</i> | 12.20 ( $\pm 5.01$ ) | 28.09 ( $\pm 4.91$ ) | 20.51         | <.0001*  |
|                                                              | <i>Skweness</i> | 12.67( $\pm 5.41$ )  | 27.61( $\pm 5.10$ )  | 17.01         | <.0001*  |
|                                                              | <i>Max Freq</i> | 12.93 ( $\pm 5.80$ ) | 27.26 ( $\pm 5.09$ ) | 16.66         | <.0001*  |
|                                                              | <i>Bin Max</i>  | 19.27( $\pm 5.06$ )  | 20.51 ( $\pm 5.35$ ) | .15           | .696     |
|                                                              | <i>ABM</i>      | 21.93( $\pm 6.66$ )  | 23.61( $\pm 5.46$ )  | .773          | .383     |
|                                                              | <i>Width</i>    | 14.80 ( $\pm 7.06$ ) | 25.96 ( $\pm 4.93$ ) | 8.67          | <.01*    |

  

|                           |  | <i>HC</i>             | <i>AD patients</i>       | <i>T test</i> | <i>p</i> |
|---------------------------|--|-----------------------|--------------------------|---------------|----------|
| <i>Euclidean Distance</i> |  | 85.73 ( $\pm 14.94$ ) | 55.56<br>( $\pm 21.57$ ) | 3.06          | <.001*   |

*Supplementary Table 1. Upper part: Comparison of the histogram indexes in white matter (eroded mask) between AD patients and HC subjects groups. Mean and (standard deviation) are mentioned for each index. Threshold significance for  $p=.05$ . Significant  $p$  values are mentioned with an asterisk. Lower part: Comparison between euclidean distance between grey and white matter for healthy controls and Alzheimer's disease patients.*
